# Supplementary material for: Oxidative atmosphere-driven formation of single-phase spinel CuRh2O4 nanofibers for alkaline water oxidation
Source: publisher site journal article supplement (doi:10.3762/bjnano.17.50), 2026-05-27
Supplement: Additional file 1 [file 2190-4286-17-50-S1.pdf]

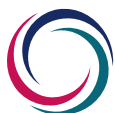

## Supporting Information

for

### **Oxidative atmosphere-driven formation of single-phase spinel $\text{CuRh}_2\text{O}_4$ nanofibers for alkaline water oxidation**

Namhee Kim, Sumin Ko, Sohyeon Choi, Seoyoon Jang, Myung Hwa Kim and Dasol Jin

*Beilstein J. Nanotechnol.* **2026**, *17*, 737–743. [doi:10.3762/bjnano.17.50](https://doi.org/10.3762/bjnano.17.50)

## Additional experimental data

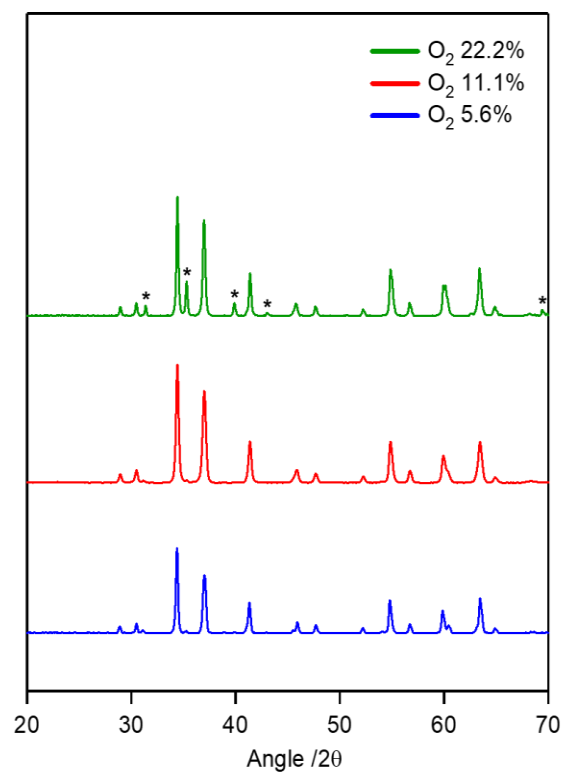

**Figure S1:** XRD patterns of the Cu–Rh bimetallic oxide nanomaterials synthesized under varying O<sub>2</sub> concentrations and annealed at 850 °C for 3 h. The unassigned diffraction peaks are attributed to the formation of spinel copper rhodium oxide (CuRh<sub>2</sub>O<sub>4</sub>), while the asterisk (\*) denotes a secondary phase corresponding to CuRhO<sub>2</sub>.

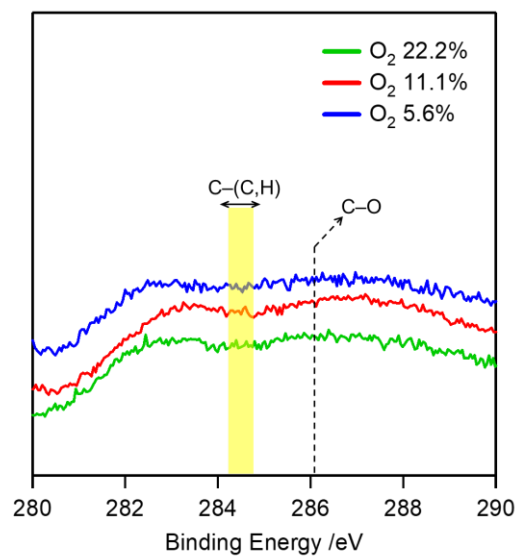

**Figure S2:** AR-XPS spectra of nanomaterials in the C 1s region.

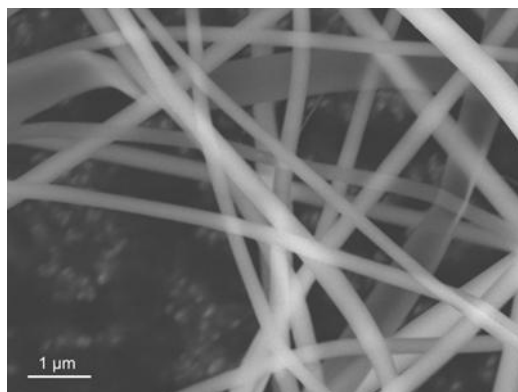

**Figure S3:** SEM image of the as-spun  $\text{CuCl}_2 + \text{RhCl}_3/\text{PVP}$  fibers.
